# Supplementary material for: Study of the Interface between Wild Bird Populations and Poultry and Their Potential Role in the Spread of Avian Influenza
Source: MDPI journal article supplement (doi:10.3390/microorganisms11102601), 2023-10-21
Supplement: s1 [file s1]

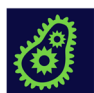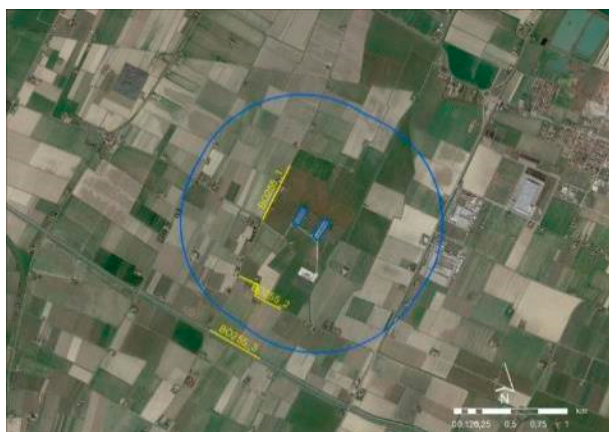

Farm BO-01

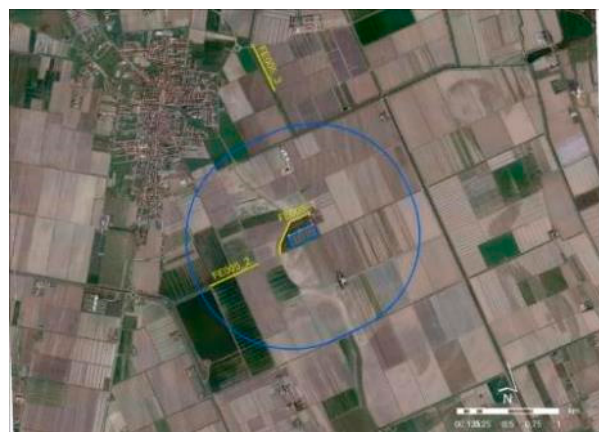

Farm FE-01

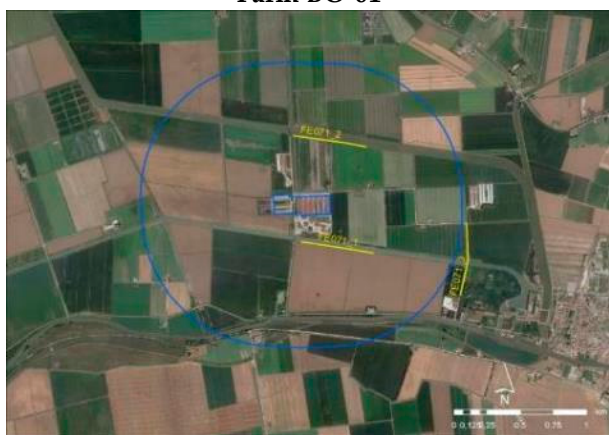

Farm FE-02

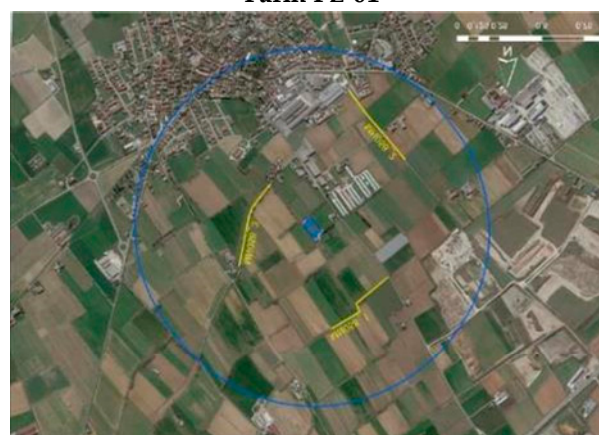

Farm MN-01

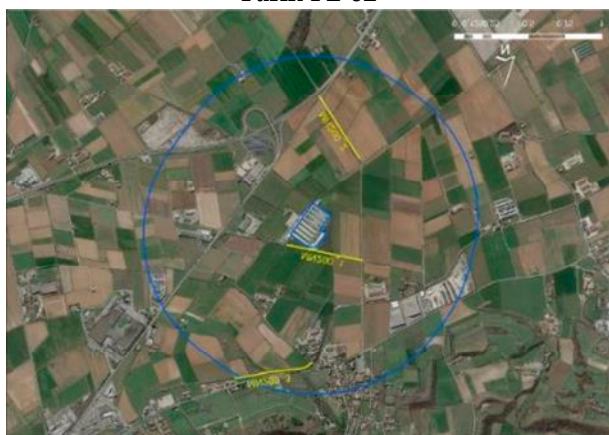

Farm MN-02

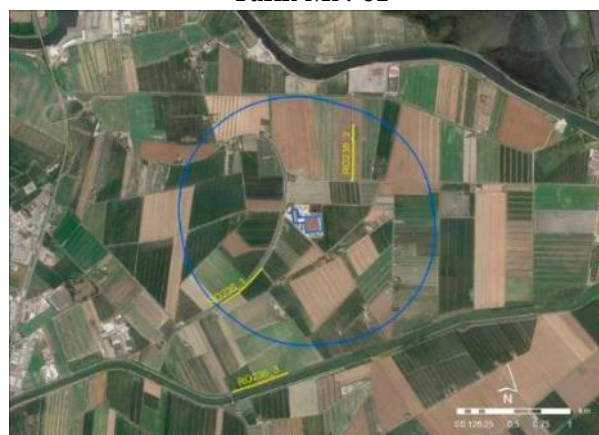

Farm RO-01

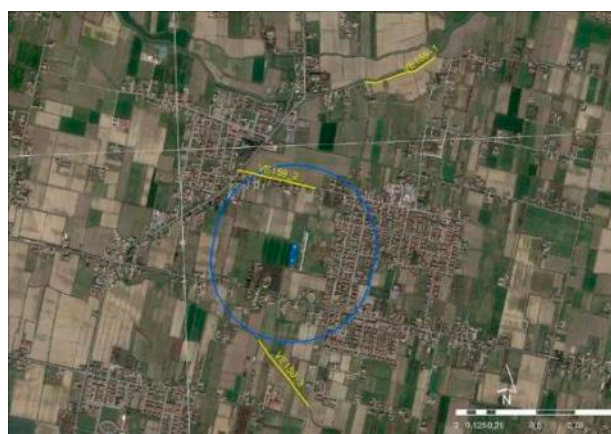**Farm VE-01**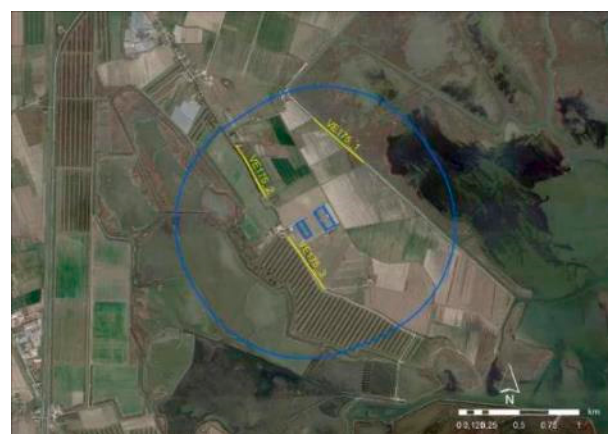**Farm VE-02**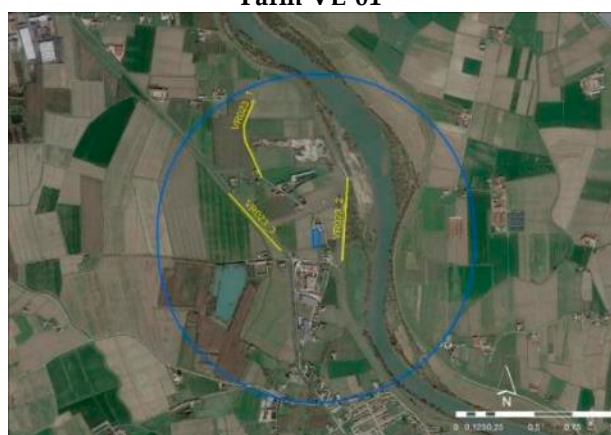**Farm VR-01**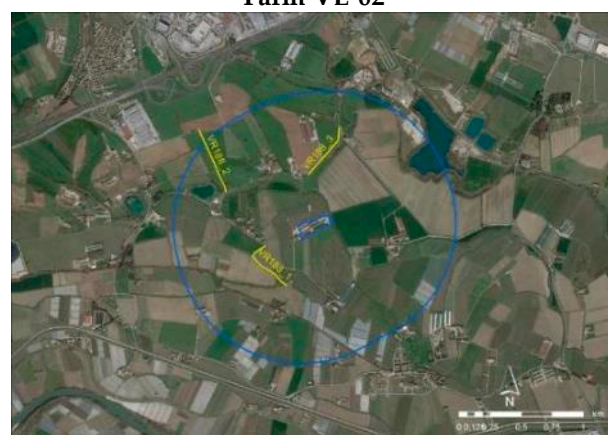**Farm VR-02**

**Figure S1.** Domestic poultry farms included in the study. Yellow lines: transects used for ornithocensus activities; blue circles: 1 km radius buffers around the farms.



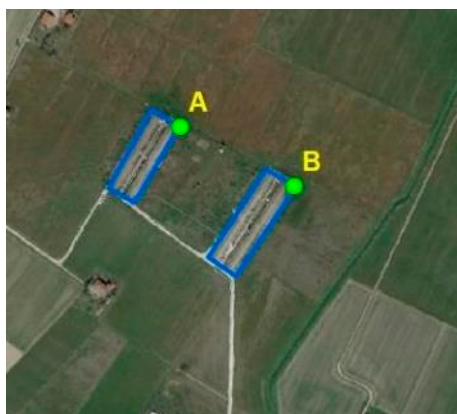

Farm BO-01

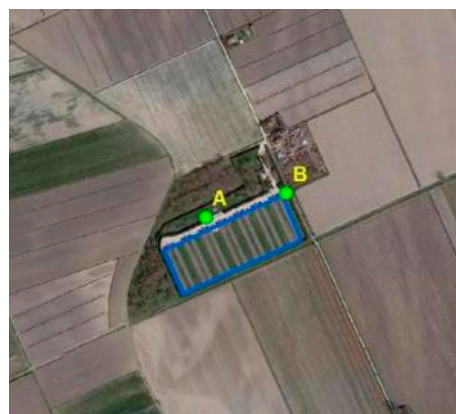

Farm FE-01

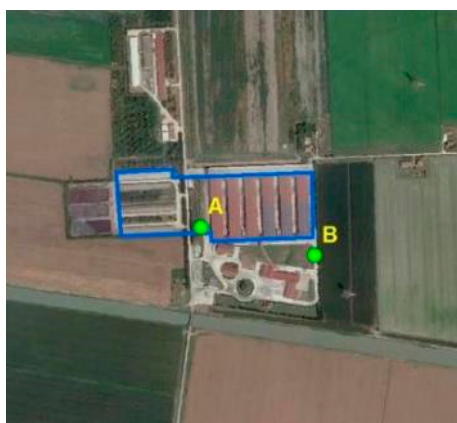

Farm FE-02

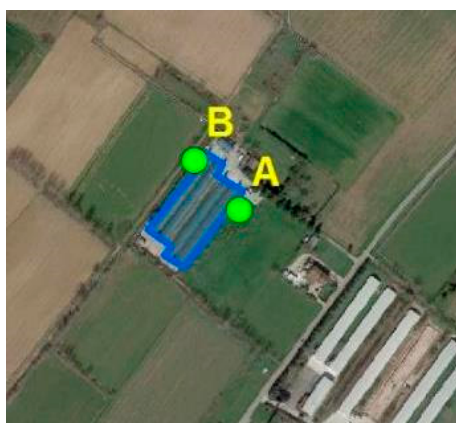

Farm MN-01

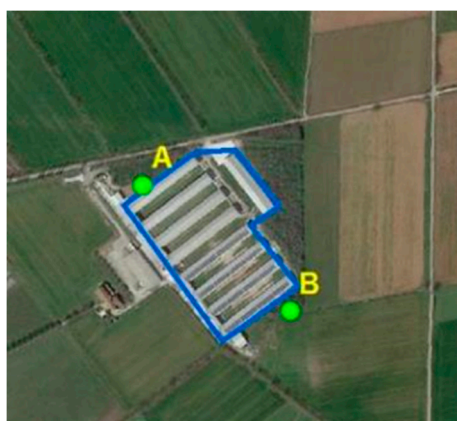

Farm MN-02

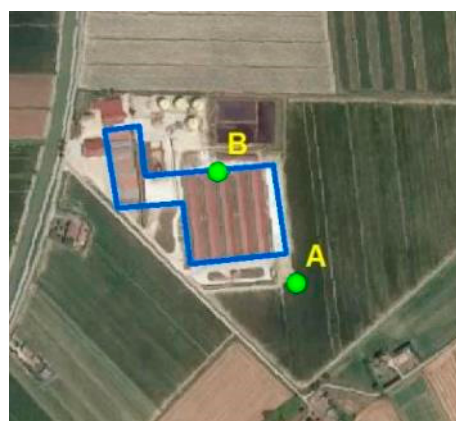

Farm RO-01

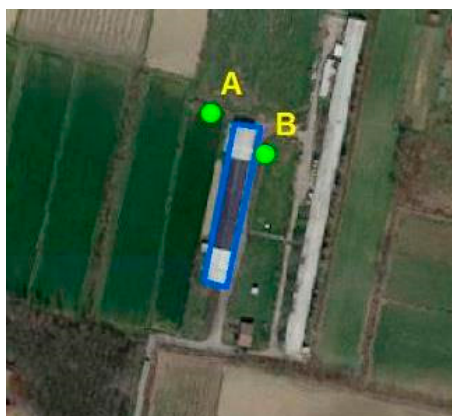

Farm VE-01

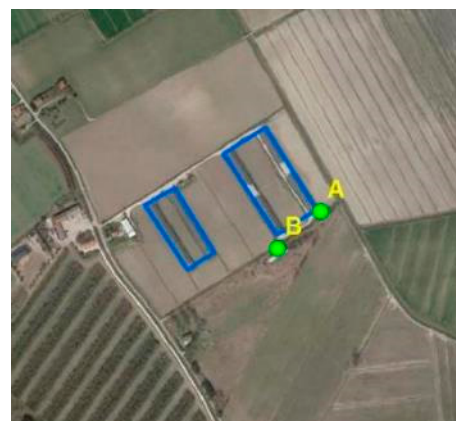

Farm VE-02

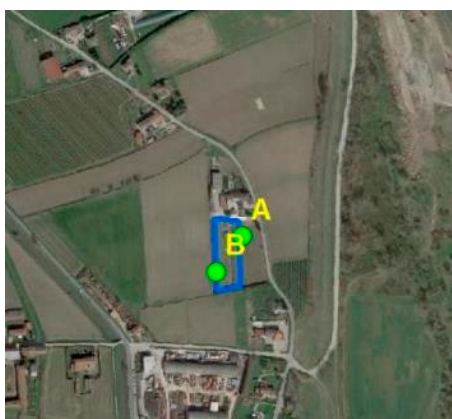

Farm VR-01

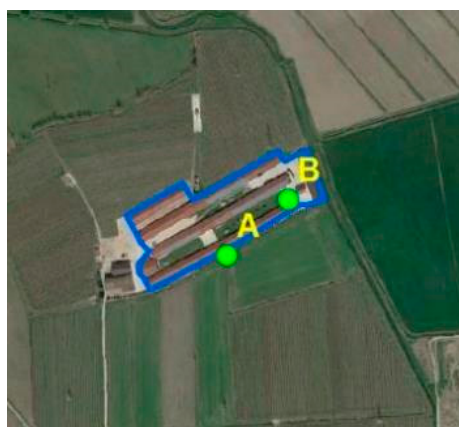

Farm VR-02

**Figure S2.** Location of the two camera traps (A and B) within the farms included in the study. Blue perimeters: farming area boundaries.

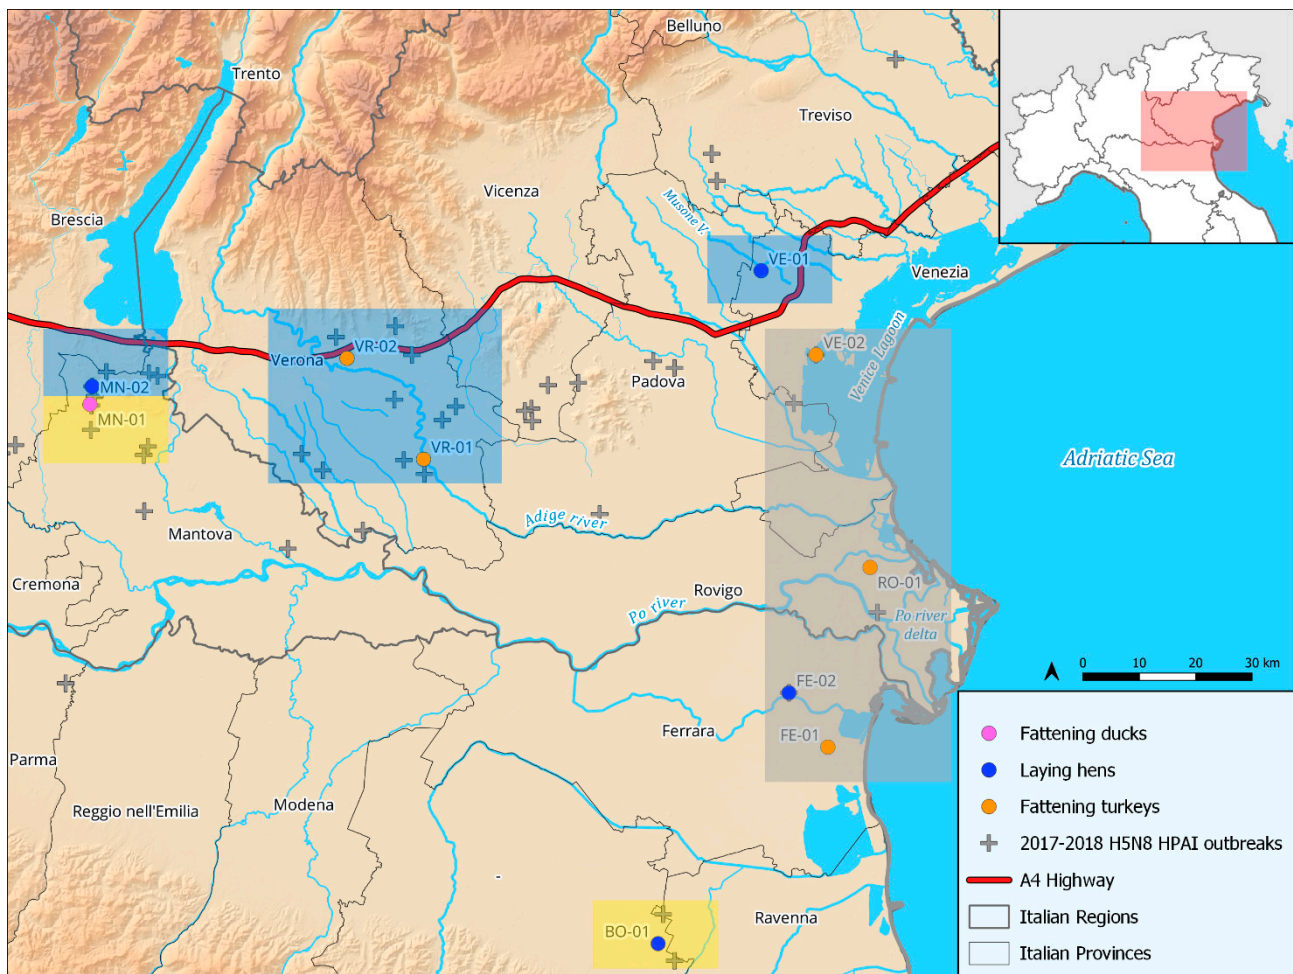

**Figure S3.** Geographic location of clusters detected through dendrogram and nMDS analysis. Grey area: Cluster 1; yellow areas: Cluster 2; blue areas: Cluster 3.

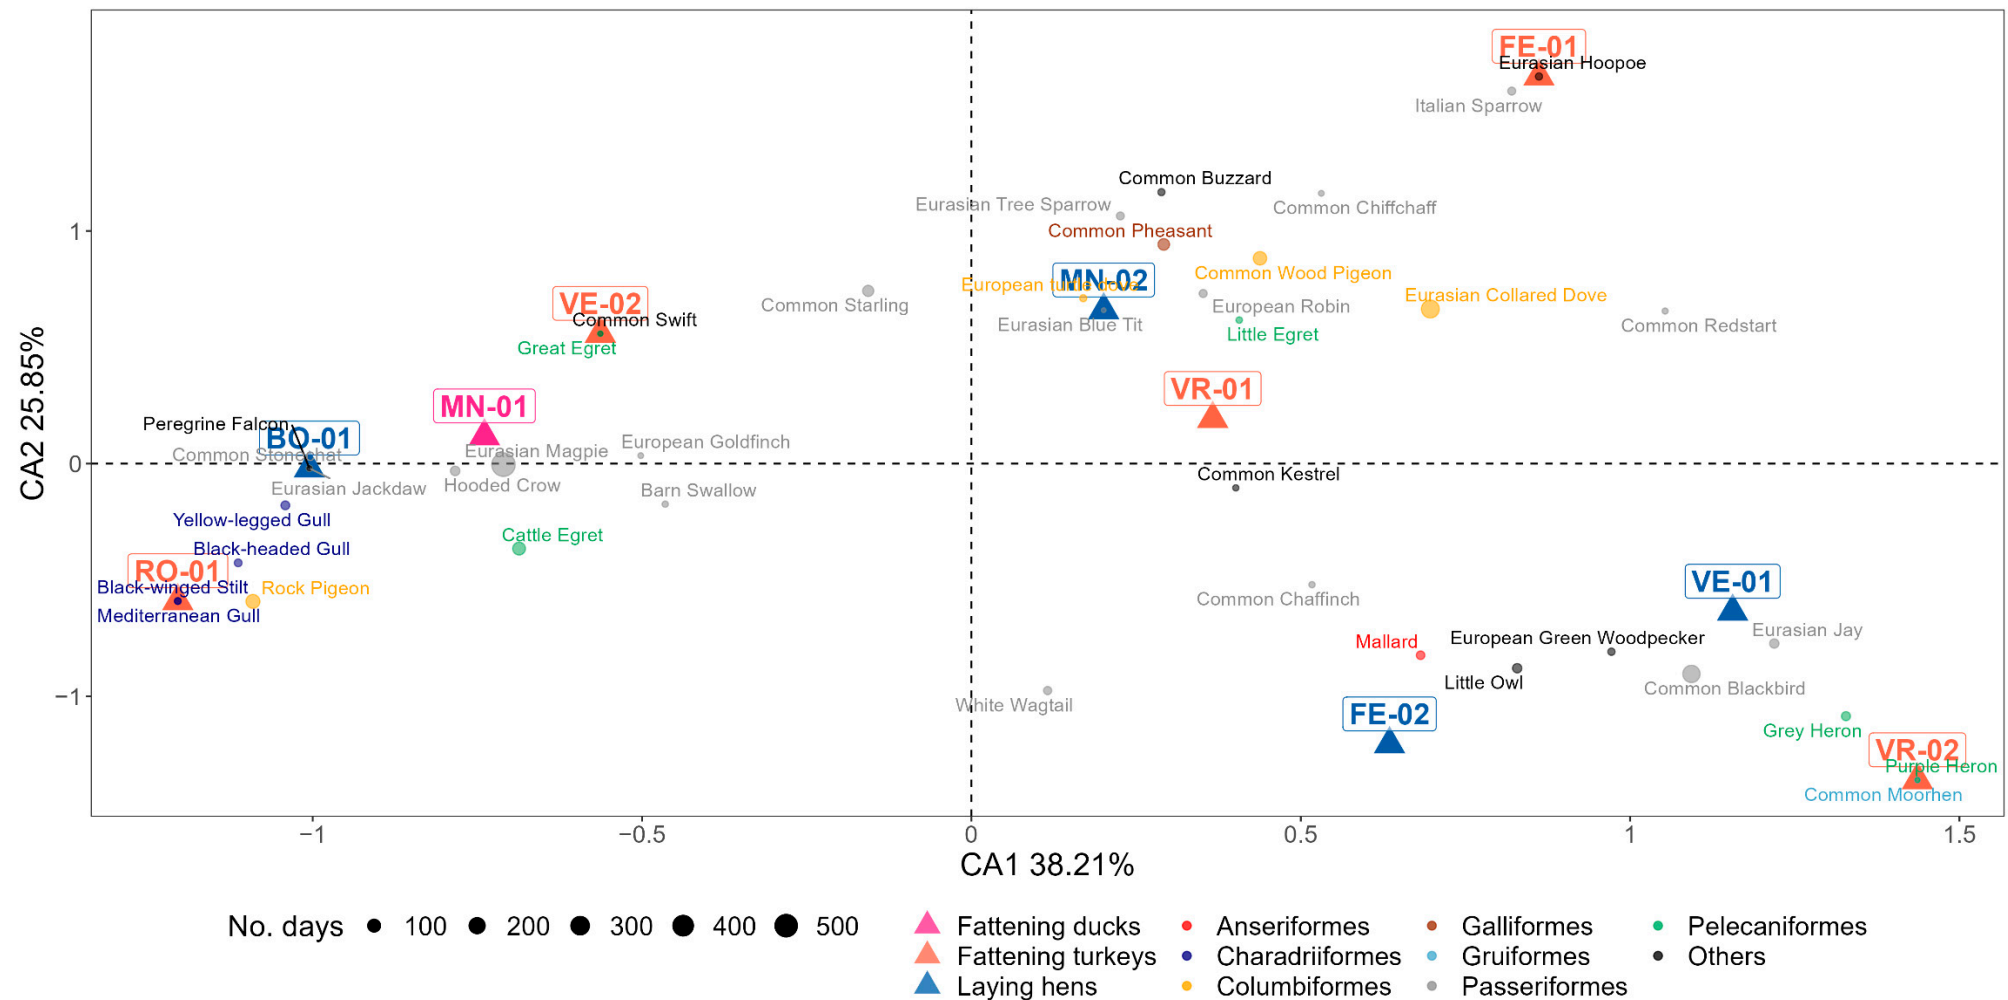

**Figure S4.** Correspondence analysis plot. Association between sites and camera-trapped species. The species are colored according to their Order. CA plot points' position reveals associations based on their angle and distance from the axes origin: same direction for positive, opposite for negative associations; shorter distances for even species distribution, longer for unequal abundances.
