# Supplementary material for: Study of the Interface between Wild Bird Populations and Poultry and Their Potential Role in the Spread of Avian Influenza
Source: MDPI journal article supplement (doi:10.3390/microorganisms11102601), 2023-10-21
Supplement: s1 [file s1]

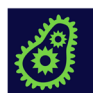

**Table S1.** Wild birds contacted via ornithological transects. For each wild bird species, Order, scientific name, common name, total number of encountered animals belonging to that species, and percentage of the total encountered animals are reported. The last column, 'Target AI', identifies the wild bird species contacted in this study that belong to the list of 50 target species for passive surveillance established by EFSA (More et al., 2017).

| Order           | Scientific name                      | Common name            | No. birds | Percentage | Target AI |
|-----------------|--------------------------------------|------------------------|-----------|------------|-----------|
| Columbiformes   | <i>Columba livia forma domestica</i> | Rock Pigeon            | 5890      | 11.16%     |           |
| Columbiformes   | <i>Columba palumbus</i>              | Common Wood Pigeon     | 5726      | 10.85%     |           |
| Passeriformes   | <i>Passer italiae</i>                | Italian Sparrow        | 4318      | 8.18%      |           |
| Passeriformes   | <i>Sturnus vulgaris</i>              | Common Starling        | 4223      | 8.00%      |           |
| Passeriformes   | <i>Hirundo rustica</i>               | Barn Swallow           | 3098      | 5.87%      |           |
| Columbiformes   | <i>Streptopelia decaocto</i>         | Eurasian Collared Dove | 2514      | 4.76%      |           |
| Anseriformes    | <i>Anas platyrhynchos</i>            | Mallard                | 2066      | 3.91%      | Yes       |
| Passeriformes   | <i>Fringilla coelebs</i>             | Common Chaffinch       | 1525      | 2.89%      |           |
| Passeriformes   | <i>Turdus merula</i>                 | Common Blackbird       | 1521      | 2.88%      |           |
| Charadriiformes | <i>Chroicocephalus ridibundus</i>    | Black-headed Gull      | 1499      | 2.84%      | Yes       |
| Passeriformes   | <i>Pica pica</i>                     | Eurasian Magpie        | 1371      | 2.60%      | Yes       |
| Charadriiformes | <i>Larus michahellis</i>             | Yellow-legged Gull     | 1200      | 2.27%      | Yes       |
| Passeriformes   | <i>Carduelis carduelis</i>           | European Goldfinch     | 1144      | 2.17%      |           |
| Passeriformes   | <i>Carduelis chloris</i>             | European Greenfinch    | 1053      | 1.99%      |           |
| Passeriformes   | <i>Sylvia atricapilla</i>            | Eurasian Blackcap      | 794       | 1.50%      |           |
| Gruiformes      | <i>Gallinula chloropus</i>           | Common Moorhen         | 760       | 1.44%      |           |
| Passeriformes   | <i>Anthus pratensis</i>              | Meadow Pipit           | 724       | 1.37%      |           |
| Passeriformes   | <i>Corvus cornix</i>                 | Hooded Crow            | 721       | 1.37%      |           |
| Passeriformes   | <i>Aegithalos caudatus</i>           | Long-tailed Tit        | 712       | 1.35%      |           |
| Suliformes      | <i>Phalacrocorax carbo</i>           | Great Cormorant        | 667       | 1.26%      | Yes       |
| Galliformes     | <i>Phasianus colchicus</i>           | Common Pheasant        | 647       | 1.23%      |           |
| Passeriformes   | <i>Erithacus rubecula</i>            | European Robin         | 629       | 1.19%      |           |
| Passeriformes   | <i>Parus major</i>                   | Great Tit              | 585       | 1.11%      |           |
| Pelecaniformes  | <i>Bubulcus ibis</i>                 | Cattle Egret           | 579       | 1.10%      |           |
| Passeriformes   | <i>Motacilla flava</i>               | Western Yellow Wagtail | 558       | 1.06%      |           |
| Passeriformes   | <i>Motacilla alba</i>                | White Wagtail          | 478       | 0.91%      |           |
| Passeriformes   | <i>Passer montanus</i>               | Eurasian Tree Sparrow  | 399       | 0.76%      |           |
| Passeriformes   | <i>Merops apiaster</i>               | European Bee-eater     | 372       | 0.70%      |           |
| Pelecaniformes  | <i>Ardea cinerea</i>                 | Grey Heron             | 339       | 0.64%      | Yes       |
| Pelecaniformes  | <i>Egretta garzetta</i>              | Little Egret           | 334       | 0.63%      | Yes       |
| Passeriformes   | <i>Luscinia megarhynchos</i>         | Common Nightingale     | 311       | 0.59%      |           |
| Passeriformes   | <i>Garrulus glandarius</i>           | Eurasian Jay           | 303       | 0.57%      |           |

| Order            | Scientific name                 | Common name               | No. birds | Percentage | Target AI |
|------------------|---------------------------------|---------------------------|-----------|------------|-----------|
| Passeriformes    | <i>Troglodytes troglodytes</i>  | Eurasian Wren             | 291       | 0.55%      |           |
| Apodiformes      | <i>Apus apus</i>                | Common Swift              | 265       | 0.50%      |           |
| Piciformes       | <i>Dendrocopos major</i>        | Great Spotted Woodpecker  | 248       | 0.47%      |           |
| Passeriformes    | <i>Corvus monedula</i>          | Eurasian Jackdaw          | 229       | 0.43%      |           |
| Piciformes       | <i>Picus viridis</i>            | European Green Woodpecker | 218       | 0.41%      |           |
| Passeriformes    | <i>Cettia cetti</i>             | Cetti's Warbler           | 214       | 0.41%      |           |
| Passeriformes    | <i>Phylloscopus collybita</i>   | Common Chiffchaff         | 205       | 0.39%      |           |
| Passeriformes    | <i>Delichon urbicum</i>         | Common House Martin       | 188       | 0.36%      |           |
| Charadriiformes  | <i>Vanellus vanellus</i>        | Northern Lapwing          | 177       | 0.34%      |           |
| Passeriformes    | <i>Oriolus oriolus</i>          | Eurasian Golden Oriole    | 176       | 0.33%      |           |
| Passeriformes    | <i>Cisticola juncidis</i>       | Zitting Cisticola         | 172       | 0.33%      |           |
| Passeriformes    | <i>Serinus serinus</i>          | European Serin            | 153       | 0.29%      |           |
| Anseriformes     | <i>Anas crecca</i>              | Eurasian Teal             | 149       | 0.28%      | Yes       |
| Passeriformes    | <i>Regulus regulus</i>          | Goldcrest                 | 146       | 0.28%      |           |
| Suliformes       | <i>Phalacrocorax pygmeus</i>    | Pygmy Cormorant           | 142       | 0.27%      |           |
| Accipitriformes  | <i>Buteo buteo</i>              | Common Buzzard            | 141       | 0.27%      | Yes       |
| Columbiformes    | <i>Streptopelia turtur</i>      | European Turtle Dove      | 133       | 0.25%      |           |
| Falconiformes    | <i>Falco tinnunculus</i>        | Common Kestrel            | 131       | 0.25%      |           |
| Anseriformes     | <i>Aythya ferina</i>            | Common Pochard            | 124       | 0.23%      | Yes       |
| Passeriformes    | <i>Alauda arvensis</i>          | Skylark                   | 121       | 0.23%      |           |
| Gruiformes       | <i>Fulica atra</i>              | Eurasian Coot             | 118       | 0.22%      |           |
| Podicipediformes | <i>Tachybaptus ruficollis</i>   | Little Grebe              | 114       | 0.22%      | Yes       |
| Pelecaniformes   | <i>Threskiornis aethiopicus</i> | African Sacred Ibis       | 100       | 0.19%      |           |
| Pelecaniformes   | <i>Casmerodius albus</i>        | Great Egret               | 90        | 0.17%      | Yes       |
| Passeriformes    | <i>Ptyonoprogne rupestris</i>   | Eurasian Crag Martin      | 88        | 0.17%      |           |
| Passeriformes    | <i>Anthus spinoletta</i>        | Water Pipit               | 62        | 0.12%      |           |
| Podicipediformes | <i>Podiceps cristatus</i>       | Great Crested Grebe       | 62        | 0.12%      | Yes       |
| Passeriformes    | <i>Saxicola torquatus</i>       | Common Stonechat          | 60        | 0.11%      |           |
| Charadriiformes  | <i>Tringa totanus</i>           | Common Redshank           | 55        | 0.10%      |           |
| Passeriformes    | <i>Emberiza calandra</i>        | Corn Bunting              | 53        | 0.10%      |           |
| Passeriformes    | <i>Carduelis spinus</i>         | Eurasian Siskin           | 51        | 0.10%      |           |
| Passeriformes    | <i>Sylvia borin</i>             | Garden Warbler            | 49        | 0.09%      |           |
| Passeriformes    | <i>Acrocephalus scirpaceus</i>  | Eurasian Reed Warbler     | 46        | 0.09%      |           |
| Anseriformes     | <i>Anser anser</i>              | Greylag Goose             | 46        | 0.09%      | Yes       |

| Order               | Scientific name                  | Common name                  | No. birds | Percentage | Target AI |
|---------------------|----------------------------------|------------------------------|-----------|------------|-----------|
| Phoenicopteriformes | <i>Phoenicopiterus roseus</i>    | Greater Flamingo             | 46        | 0.09%      |           |
| Charadriiformes     | <i>Sterna hirundo</i>            | Common Tern                  | 46        | 0.09%      |           |
| Coraciiformes       | <i>Alcedo atthis</i>             | Common Kingfisher            | 44        | 0.08%      |           |
| Passeriformes       | <i>Emberiza schoeniclus</i>      | Reed Bunting                 | 44        | 0.08%      |           |
| Anseriformes        | <i>Tadorna tadorna</i>           | Common Shelduck              | 44        | 0.08%      | Yes       |
| Charadriiformes     | <i>Actitis hypoleucos</i>        | Common Sandpiper             | 43        | 0.08%      |           |
| Passeriformes       | <i>Phoenicurus ochruros</i>      | Black Redstart               | 39        | 0.07%      |           |
| Passeriformes       | <i>Cyanistes caeruleus</i>       | Eurasian Blue Tit            | 38        | 0.07%      |           |
| Pelecaniformes      | <i>Ardea purpurea</i>            | Purple Heron                 | 36        | 0.07%      |           |
| Anseriformes        | <i>Aythya nyroca</i>             | Ferruginous Duck             | 36        | 0.07%      |           |
| Passeriformes       | <i>Muscicapa striata</i>         | Spotted Flycatcher           | 35        | 0.07%      |           |
| Passeriformes       | <i>Prunella modularis</i>        | Dunnock                      | 32        | 0.06%      |           |
| Charadriiformes     | <i>Larus melanocephalus</i>      | Mediterranean Gull           | 31        | 0.06%      |           |
| Anseriformes        | <i>Aythya fuligula</i>           | Tufted Duck                  | 30        | 0.06%      |           |
| Charadriiformes     | <i>Gelochelidon nilotica</i>     | Gull-billed Tern             | 29        | 0.05%      |           |
| Passeriformes       | <i>Acrocephalus arundinaceus</i> | Great Reed Warbler           | 24        | 0.05%      |           |
| Anseriformes        | <i>Anas querquedula</i>          | Garganey                     | 24        | 0.05%      |           |
| Cuculiformes        | <i>Cuculus canorus</i>           | Common Cuckoo                | 23        | 0.04%      |           |
| Charadriiformes     | <i>Gallinago gallinago</i>       | Common Snipe                 | 23        | 0.04%      |           |
| Passeriformes       | <i>Anthus campestris</i>         | Tawny Pipit                  | 19        | 0.04%      |           |
| Pelecaniformes      | <i>Nycticorax nycticorax</i>     | Black-crowned Night<br>Heron | 19        | 0.04%      |           |
| Accipitriformes     | <i>Circus aeruginosus</i>        | Western Marsh Harrier        | 18        | 0.03%      |           |
| Passeriformes       | <i>Phylloscopus trochilus</i>    | Willow Warbler               | 18        | 0.03%      |           |
| Charadriiformes     | <i>Tringa glareola</i>           | Wood Sandpiper               | 18        | 0.03%      |           |
| Passeriformes       | <i>Hippolais polyglotta</i>      | Melodious Warbler            | 17        | 0.03%      |           |
| Charadriiformes     | <i>Tringa nebularia</i>          | Common Greenshank            | 17        | 0.03%      |           |
| Accipitriformes     | <i>Circus pygargus</i>           | Montagu's Harrier            | 16        | 0.03%      |           |
| Accipitriformes     | <i>Circus cyaneus</i>            | Northern Harrier             | 15        | 0.03%      |           |
| Charadriiformes     | <i>Tringa ochropus</i>           | Green Sandpiper              | 15        | 0.03%      | Yes       |
| Passeriformes       | <i>Phoenicurus phoenicurus</i>   | Common Redstart              | 14        | 0.03%      |           |
| Charadriiformes     | <i>Sterna sandvicensis</i>       | Sandwich Tern                | 14        | 0.03%      |           |
| Passeriformes       | <i>Turdus pilaris</i>            | Fieldfare                    | 13        | 0.02%      | Yes       |
| Passeriformes       | <i>Acrocephalus palustris</i>    | Marsh Warbler                | 12        | 0.02%      |           |
| Passeriformes       | <i>Riparia riparia</i>           | Sand Martin                  | 12        | 0.02%      |           |
| Pelecaniformes      | <i>Ardeola ralloides</i>         | Squacco Heron                | 11        | 0.02%      |           |

| Order            | Scientific name                 | Common name            | No. birds | Percentage | Target AI |
|------------------|---------------------------------|------------------------|-----------|------------|-----------|
| Bucerotiformes   | <i>Upupa epops</i>              | Eurasian Hoopoe        | 11        | 0.02%      |           |
| Passeriformes    | <i>Phylloscopus sibilatrix</i>  | Wood                   | 10        | 0.02%      |           |
| Strigiformes     | <i>Athene noctua</i>            | Little Owl             | 9         | 0.02%      |           |
| Charadriiformes  | <i>Haematopus ostralegus</i>    | Eurasian Oystercatcher | 9         | 0.02%      |           |
| Podicipediformes | <i>Podiceps nigricollis</i>     | Black-necked Grebe     | 9         | 0.02%      | Yes       |
| Galliformes      | <i>Coturnix coturnix</i>        | Common Quail           | 8         | 0.02%      |           |
| Accipitriformes  | <i>Accipiter nisus</i>          | Eurasian Sparrowhawk   | 7         | 0.01%      |           |
| Passeriformes    | <i>Motacilla cinerea</i>        | Grey Wagtail           | 7         | 0.01%      |           |
| Passeriformes    | <i>Oenanthe oenanthe</i>        | Northern Wheatear      | 7         | 0.01%      |           |
| Gruiformes       | <i>Rallus aquaticus</i>         | Water Rail             | 7         | 0.01%      |           |
| Passeriformes    | <i>Remiz pendulinus</i>         | Eurasian Penduline Tit | 7         | 0.01%      |           |
| Passeriformes    | <i>Turdus philomelos</i>        | Song Thrush            | 7         | 0.01%      |           |
| Passeriformes    | <i>Carduelis cannabina</i>      | Eurasian Linnet        | 6         | 0.01%      |           |
| Anseriformes     | <i>Cygnus olor</i>              | Mute Swan              | 6         | 0.01%      | Yes       |
| Falconiformes    | <i>Falco subbuteo</i>           | Eurasian Hobby         | 6         | 0.01%      |           |
| Passeriformes    | <i>Lanius collurio</i>          | Red-backed Shrike      | 6         | 0.01%      |           |
| Galliformes      | <i>Perdix perdix</i>            | Grey Partridge         | 6         | 0.01%      |           |
| Passeriformes    | <i>Galerida cristata</i>        | Crested Lark           | 5         | 0.01%      |           |
| Pelecaniformes   | <i>Ixobrychus minutus</i>       | Little Bittern         | 5         | 0.01%      |           |
| Piciformes       | <i>Jynx torquilla</i>           | Eurasian Wryneck       | 5         | 0.01%      |           |
| Pelecaniformes   | <i>Plegadis falcinellus</i>     | Glossy Ibis            | 5         | 0.01%      |           |
| Passeriformes    | <i>Sylvia communis</i>          | Common Whitethroat     | 5         | 0.01%      |           |
| Anseriformes     | <i>Anas acuta</i>               | Northern Pintail       | 4         | 0.01%      | Yes       |
| Accipitriformes  | <i>Falco peregrinus</i>         | Peregrine Falcon       | 4         | 0.01%      | Yes       |
| Gruiformes       | <i>Grus grus</i>                | Common Crane           | 4         | 0.01%      |           |
| Charadriiformes  | <i>Larus canus</i>              | Common Gull            | 4         | 0.01%      | Yes       |
| Passeriformes    | <i>Saxicola rubetra</i>         | Whinchat               | 4         | 0.01%      |           |
| Passeriformes    | <i>Fringilla montifringilla</i> | Brambling              | 3         | 0.01%      |           |
| Passeriformes    | <i>Turdus viscivorus</i>        | Mistle Thrush          | 3         | 0.01%      |           |
| Charadriiformes  | <i>Chlidonias leucopterus</i>   | White-winged Tern      | 2         | 0.004%     |           |
| Coraciiformes    | <i>Coracias garrulus</i>        | European Roller        | 2         | 0.004%     |           |
| Passeriformes    | <i>Emberiza citrinella</i>      | Yellowhammer           | 2         | 0.004%     |           |
| Charadriiformes  | <i>Numenius arquata</i>         | Eurasian Curlew        | 2         | 0.004%     |           |
| Strigiformes     | <i>Otus scops</i>               | Eurasian Scops Owl     | 2         | 0.004%     |           |
| Passeriformes    | <i>Periparus ater</i>           | Coal Tit               | 2         | 0.004%     |           |
| Accipitriformes  | <i>Pernis apivorus</i>          | European Honey         | 2         | 0.004%     |           |

| Order           | Scientific name                | Common name          | No. birds    | Percentage  | Target AI |
|-----------------|--------------------------------|----------------------|--------------|-------------|-----------|
|                 |                                | Buzzard              |              |             |           |
| Passeriformes   | <i>Corvus corone</i>           | Carrion Crow         | 1            | 0.002%      |           |
| Passeriformes   | <i>Emberiza cia</i>            | Rock Bunting         | 1            | 0.002%      |           |
| Passeriformes   | <i>Ficedula hypoleuca</i>      | Pied Flycatcher      | 1            | 0.002%      |           |
| Charadriiformes | <i>Hydroprogne caspia</i>      | Caspian Tern         | 1            | 0.002%      |           |
| Psittaciformes  | <i>Melopsittacus undulatus</i> | Budgerigar           | 1            | 0.002%      |           |
| Psittaciformes  | <i>Psittacula krameri</i>      | Rose-ringed Parakeet | 1            | 0.002%      |           |
| Passeriformes   | <i>Pyrrhula pyrrhula</i>       | Eurasian Bullfinch   | 1            | 0.002%      |           |
| Passeriformes   | <i>Sitta europaea</i>          | Eurasian Nuthatch    | 1            | 0.002%      |           |
| Strigiformes    | <i>Tyto alba</i>               | Barn Owl             | 1            | 0.002%      |           |
| <b>Total</b>    |                                |                      | <b>52794</b> | <b>100%</b> | <b>21</b> |

**Table S2.** List of target species for passive surveillance of Avian Influenza in wild birds established by EFSA in 2017 (adapted from More et al., 2017).

| Family                             | Subfamily, tribe, or genus            | Species                                                | % positive (no.positive/no. tested) |
|------------------------------------|---------------------------------------|--------------------------------------------------------|-------------------------------------|
| Ducks, geese, and swans (Anatidae) | Diving ducks (Aythyini)               | Tufted duck ( <i>Aythya fuligula</i> )                 | 33.4% (338/1011)                    |
|                                    |                                       | Greater scaup ( <i>Aythya marila</i> )                 | 12.7% (9/71)                        |
|                                    |                                       | Common pochard ( <i>Aythya ferina</i> )                | 11.4% (26/228)                      |
|                                    |                                       | Red-crested pochard ( <i>Netta rufina</i> )            | 0.9% (1/112)                        |
|                                    | Dabbling ducks (Anatinae)             | Northern pintail ( <i>Anas acuta</i> )                 | 5.4% (3/56)                         |
|                                    |                                       | Eurasian wigeon ( <i>Anas penelope</i> )               | 3.7% (8/219)                        |
|                                    |                                       | Gadwall ( <i>Anas strepera</i> )                       | 1.7% (3/179)                        |
|                                    |                                       | Mallard ( <i>Anas platyrhynchos</i> )                  | 0.5% (96/20672)                     |
|                                    |                                       | Eurasian teal ( <i>Anas crecca</i> )                   | 0.4% (5/1145)                       |
|                                    | Sea ducks (Mergini)                   | Goosander ( <i>Mergus merganser</i> )                  | 6.4% (7/109)                        |
|                                    |                                       | Common goldeneye ( <i>Bucephala clangula</i> )         | 5.7% (3/53)                         |
|                                    |                                       | Smew ( <i>Mergus albellus</i> )                        | 5.0% (1/20)                         |
|                                    |                                       | Common eider ( <i>Somateria mollissima</i> )           | 1.3% (3/228)                        |
|                                    | Shelducks and sheldgeese (Tadorninae) | Common shelduck ( <i>Tadorna tadorna</i> )             | 0.5% (1/218)                        |
|                                    |                                       | Egyptian goose ( <i>Alopochen aegyptiacus</i> )        | 0.4% (1/234)                        |
|                                    | True geese (Anser, Branta, Chen)      | Lesser white-fronted goose ( <i>Anser erythropus</i> ) | 13% (3/23)                          |
|                                    |                                       | Greylag goose ( <i>Anser anser</i> )                   | 3.5% (68/1968)                      |
|                                    |                                       | Taiga bean Goose ( <i>Anser fabalis</i> )              | 2.8% (4/143)                        |
|                                    |                                       | Canada goose ( <i>Branta canadensis</i> )              | 1.8% (19/1061)                      |

| Family                                        | Subfamily, tribe, or genus | Species                                                          | % positive (no.positive/no. tested) |
|-----------------------------------------------|----------------------------|------------------------------------------------------------------|-------------------------------------|
|                                               |                            | Pink-footed goose ( <i>Anser brachyrhynchus</i> )                | 1.3% (1/75)                         |
|                                               |                            | Brant goose ( <i>Branta bernicla</i> )                           | 1.2% (1/84)                         |
|                                               |                            | Greater white-fronted goose ( <i>Anser albifrons</i> )           | 0.6% (2/350)                        |
|                                               | Swans ( <i>Cygnus</i> )    | Black swan ( <i>Cygnus atratus</i> )                             | 9.5% (6/63)                         |
|                                               |                            | Whooper swan ( <i>Cygnus cygnus</i> )                            | 9.3% (169/1818)                     |
|                                               |                            | Mute swan ( <i>Cygnus olor</i> )                                 | 7.6% (931/12268)                    |
| Grebes (Podicipedidae)                        |                            | Black-necked grebe ( <i>Podiceps nigricollis</i> )               | 79.9% (246/308)                     |
|                                               |                            | Great crested grebe ( <i>Podiceps cristatus</i> )                | 8.5% (50/588)                       |
|                                               |                            | Little grebe ( <i>Tachybaptus ruficollis</i> )                   | 7.8% (6/77)                         |
| Storks (Ciconiidae)                           |                            | White stork ( <i>Ciconia ciconia</i> )                           | 0.5% (5/911)                        |
| Hérons (Ardeidae)                             |                            | Eurasian bittern ( <i>Botaurus stellaris</i> )                   | 2.9% (1/35)                         |
|                                               |                            | Little egret ( <i>Egretta garzetta</i> )                         | 2.9% (2/69)                         |
|                                               |                            | Great white egret ( <i>Egretta alba</i> )                        | 0.9% (4/441)                        |
|                                               |                            | Grey heron ( <i>Ardea cinerea</i> )                              | 0.8% (40/5093)                      |
| Pelicans (Pelecanidae)                        |                            | Dalmatian pelican ( <i>Pelecanus crispus</i> )                   | 27.5% (11/40)                       |
|                                               |                            | Great white pelican ( <i>Pelecanus onocrotalus</i> )             | 9.5% (2/21)                         |
| Cormorants and shags (Phalacrocoracidae)      |                            | Great cormorant ( <i>Phalacrocorax carbo</i> )                   | 0.6% (12/2090)                      |
| Raptors (Accipitridae, Falconidae, Strigidae) |                            | White-tailed eagle ( <i>Haliaeetus albicilla</i> )               | 6.6% (28/426)                       |
|                                               |                            | Rough-legged buzzard ( <i>Buteo lagopus</i> )                    | 3.7% (1/27)                         |
|                                               |                            | Common buzzard ( <i>Buteo buteo</i> )                            | 1.1% (72/6307)                      |
|                                               |                            | Peregrine falcon ( <i>Falco peregrinus</i> )                     | 3.4% (10/297)                       |
|                                               |                            | Northern goshawk ( <i>Accipiter gentilis</i> )                   | 1.3% (8/616)                        |
|                                               |                            | Eurasian eagle-owl ( <i>Bubo bubo</i> )                          | 0.9% (3/340)                        |
| Coots, crakes, and rails (Rallidae)           |                            | Western swamphen ( <i>Porphyrio porphyrio</i> )                  | 6.7% (1/15)                         |
| Sandpipers (Scolopacidae) <sup>(b)</sup>      |                            | Green sandpiper ( <i>Tringa ochropus</i> )                       | 33.3% (1/3)                         |
| Gulls, terns, and allies (Laridae)            |                            | Great black-backed gull ( <i>Larus marinus</i> )                 | 13.8% (22/159)                      |
|                                               |                            | European herring gull ( <i>Larus argentatus</i> ) <sup>(a)</sup> | 3.1% (66/2135)                      |
|                                               |                            | Mew gull ( <i>Larus canus</i> )                                  | 0.8 (4/481)                         |
|                                               |                            | Black-headed gull ( <i>Chroicocephalus ridibundus</i> )          | 0.7% (30/4075)                      |
| Corvids (Corvidae)                            |                            | Eurasian magpie ( <i>Pica pica</i> )                             | 0.6% (7/1232)                       |
| Thrushes (Turdidae)                           |                            | Fieldfare ( <i>Turdus pilaris</i> )                              | 0.5% (1/192)                        |

<sup>(a)</sup> This does not include the Caspian gull (*Larus cachinnans*) or the yellow-legged gull (*Larus michahellis*), which are considered separate species. <sup>(b)</sup> Another wader, *Numenius* species was not included in this list because it was not identified to species. However, in the EU, the two most likely *Numenius* species are the Eurasian curlew (*N. arquata*) and the whimbrel (*N. phaeopus*).

**Table S3.** Pairwise Wilcoxon test calculated on the distributions of wild birds encountered in ornithological transects. Correction method: Benjamini-Hochberg. Significant p-values (<0.05) are highlighted in green.

|       | BO-01 | FE-01  | FE-02  | MN-01  | MN-02 | RO-01 | VE-01 | VE-02 | VR-01 |
|-------|-------|--------|--------|--------|-------|-------|-------|-------|-------|
| FE-01 | 0.375 |        |        |        |       |       |       |       |       |
| FE-02 | 0.180 | 0.153  |        |        |       |       |       |       |       |
| MN-01 | 0.289 | 0.146  | 0.689  |        |       |       |       |       |       |
| MN-02 | 0.002 | 0.010  | 0.119  | 0.023  |       |       |       |       |       |
| RO-01 | 0.023 | 0.025  | 0.105  | 0.075  | 0.703 |       |       |       |       |
| VE-01 | 9.975 | 0.0001 | 0.0003 | 0.0001 | 0.005 | 0.068 |       |       |       |
| VE-02 | 0.153 | 0.077  | 0.289  | 0.344  | 0.812 | 0.657 | 0.050 |       |       |
| VR-01 | 0.014 | 0.014  | 0.223  | 0.102  | 0.696 | 0.718 | 0.020 | 0.657 |       |
| VR-02 | 0.000 | 0.001  | 0.011  | 0.002  | 0.153 | 0.289 | 0.223 | 0.153 | 0.171 |

**Table S4.** Pairwise Wilcoxon test calculated between the distributions of at the Chao1 richness indices for the three clusters. Correction method: Benjamini-Hochberg. Significant p-values (<0.05) are highlighted in green.

|           | Cluster 1 | Cluster 2 |
|-----------|-----------|-----------|
| Cluster 2 | 0.0002    |           |
| Cluster 3 | 0.0002    | 0.023     |

**Table S5.** Pairwise Wilcoxon test calculated between the distributions of Shannon diversity indices for the three clusters. Correction method: Benjamini-Hochberg. Significant p-values (<0.05) are highlighted in green.

|           | Cluster 1 | Cluster 2 |
|-----------|-----------|-----------|
| Cluster 2 | 0.0003    |           |
| Cluster 3 | 0.285     | 0.0001    |

**Table S6.** Pairwise Wilcoxon test calculated between the distributions of Pielou's evenness diversity indices for the three clusters. Correction method: Benjamini-Hochberg. Significant p-values (<0.05) are highlighted in green.

|           | Cluster 1 | Cluster 2 |
|-----------|-----------|-----------|
| Cluster 2 | 0.016     |           |
| Cluster 3 | 0.012     | 0.0004    |

**Table S7.** Installation and removal dates for the camera-traps in each farm.

| Camera traps location | Installation Date | Removal Date |
|-----------------------|-------------------|--------------|
| BO-01-A               | 25/01/2019        | 31/12/2019   |
| BO-01-B               | 25/01/2019        | 31/12/2019   |
| FE-01-A               | 07/01/2019        | 31/12/2019   |
| FE-01-B               | 07/01/2019        | 31/12/2019   |
| FE-02-A               | 16/01/2019        | 31/12/2019   |
| FE-02-B               | 16/01/2019        | 31/12/2019   |
| MN-01-A               | 28/01/2019        | 31/12/2019   |
| MN-01-B               | 28/01/2019        | 31/12/2019   |
| MN-02-A               | 11/01/2019        | 31/12/2019   |
| MN-02-B               | 11/01/2019        | 31/12/2019   |

---

| Camera traps location | Installation Date | Removal Date |
|-----------------------|-------------------|--------------|
| RO-01-A               | 01/01/2019        | 31/12/2019   |
| RO-01-B               | 01/01/2019        | 31/12/2019   |
| VE-01-A               | 08/02/2019        | 31/12/2019   |
| VE-01-B               | 08/02/2019        | 31/12/2019   |
| VE-02-A               | 15/01/2019        | 31/12/2019   |
| VE-02-B               | 15/01/2019        | 31/12/2019   |
| VR-01-A               | 03/01/2019        | 31/12/2019   |
| VR-01-B               | 03/01/2019        | 31/12/2019   |
| VR-02-A               | 21/01/2019        | 31/12/2019   |
| VR-02-B               | 21/01/2019        | 31/12/2019   |

The total number of camera trap days was 6988, while the total daily events per farms were 1936, equal to 2055 daily events per camera trap.
